# Supplementary material
Source: PubMed Central journal article supplement (PMC9283318)

## SUPPLEMENTAL FIGURE TITLES & LEGENDS

**Figure S1. *Allobaculum* sp. 128 does not bloom during inflammation, and a second UC patient *Allobaculum* isolate is colitogenic in gnotobiotic mice, Related to Figure 1.** (A) Time course of fecal microbiota profiling of MC+Allo colonized mice across 7 days of 2% DSS administration (n=4 mice/group). (B) Time course of fecal lipocalin (LCN-2) overlaid with *Allobaculum* sp. 128 abundance. (C) H&E-stained colon sections from *Rag1*<sup>-/-</sup> mice on d7 of DSS administration. Scale bars, 200µm. (D-E) Colon lamina propria CD4<sup>+</sup>IL-17A<sup>+</sup> T cells from *Il10*<sup>-/-</sup> mice after 8 weeks colonization (n=5 mice/group). (F-G) GF mice were monocolonized with either *Ery47* (control bacteria) or *Allobaculum* sp. 128 for 7 days before the induction of acute colitis via 2% DSS administration. Colonic inflammation was assessed by fecal lipocalin on d3 (F) and colon length on d7 (G) (n=5 mice/group). (H) Phylogenetic tree constructed using 16S rRNA gene sequences from members of family *Erysipelotrichaceae*, using maximum likelihood estimation, bootstrapped (BS) to 1,000 replicates. BS values are shown along branches. (I) Experimental schematic. (J) Second *Allobaculum* isolate (Allo2) was used for acute colitis model in WT gnotobiotic mice as in Figure 1C-1H. Three of six mice colonized with Allo2 were found dead (3 F.D.) prior to endpoint. (K) Fecal lipocalin, LCN2, was measured longitudinally by ELISA. Error bars show Mean ± SEM. Data shown in (A-B) from N=1 experiment. Data in (D-E) from one of N=2 experiments. Data in (F-G) from N=1 experiment. Data shown in (J-K) from one of N=2 independent experiments, n=5-6 mice per group.

**Figure S2. Unremarkable histopathology and total serum Ig of untreated *Allobaculum* sp. 128-colonized WT mice, Related to Figure 1.** (A) Bouin's-fixed H&E-stained colon sections from WT mice colonized with MC bacteria or MC+*Allobaculum* sp. 128, euthanized 12 weeks later. Scale bars, 200µm. (B) Blinded scoring for colitis. One experiment shown is representative of N=2 independent experiments. (C-D) Total serum IgA and IgG content at 7 weeks (n=3-4 mice/group). (E) FITC-dextran concentration in serum 1h after oral gavage (n=4-8 mice/group). (F) *Allobaculum* sp. 128-specific IgG in fecal water at 7 weeks post-colonization with MC or MC+Allo (n=5 mice/group). (G) Thickness of the colonic inner mucus layer after 2 weeks of colonization (tissues fixed in Carnoy's solution to preserved the inner mucus layer; n=10-12 mice/group). Welch's t-test was used to compare microbiota groups at each time point. \*\*  $P < 0.01$ , \*  $P < 0.05$ . Data shown in (A-B) are from one representative of N=3 experiments. Data shown in (C-D) show one of N=2 experiments. Data in (E) are from N=1 experiments. Data in (F) show one of N=2 experiments. Data in (G) are compiled from N=2 experiments.

**Figure S3. Microbial diversity cannot explain the relationship between *Allobaculum* and *A. muciniphila*, *A. muciniphila* and *Allobaculum* co-colonize the ileal mucosa, and co-colonization has minimal impacts on *A. muciniphila* and *Allobaculum* gene expression, Related to Figures 3 & 4.** (A) Genus-level richness, Simpson's diversity index, Shannon's diversity index, and evenness of each microbiome that contained *Allobaculum* (n=14) or lacked *Allobaculum* sp. 128 (n=5). (B) Legend accompanying Fig. 4B. Data shown from N=1 experiment. (C) GF WT mice were mono- or bi-colonized as shown for 10 days. Terminal ilea were fixed and sections stained with bacterial FISH probes EUB338 (to stain *Allobaculum*) and VP403 (to stain *A. muciniphila*). Scale bars, 10µm. (D) *In vivo* bacterial transcriptomes from the

ileum and colon were compared for differential expression of ORFs across single colonization or co-colonization conditions (MC+Allo vs MC+Both, and MC+Akk vs. MC+Both). (E) *Allobaculum* sp. 128 and (F) *A. muciniphila* ORFs that were differentially expressed in the ileum, along with their fold changes, P-values, and annotations (Prokka). Data are from N=1 experiment.

**Figure S4. Type strain *A. muciniphila* attenuates *Allobaculum* sp. 128-mediated colitis and *Allobaculum* sp. 128 blunts *A. muciniphila*-induced dendritic cell responses in MLN, Related to Figure 5.** (A) Experimental schematic for acute DSS colitis in WT gnotobiotic mice colonized with MC, MC+*Allobaculum* sp. 128, MC+*A. muciniphila*<sup>T</sup> (type strain ATCC BAA-835), or MC+*Allobaculum* sp. 128+*A. muciniphila*<sup>T</sup> (ATCC BAA-835) (n=4-6 mice/group). (B) Fecal microbiota profiling, (C) colon length, (D) d2 fecal lipocalin (LCN2), and (E) gross colon pathology. (F) Representative gating strategy for analysis of MLN cells performed in FlowJo after ≥100,000 events per sample were collected. (G) Immunophenotyping of MLN cell populations (% of viable cells) (n=4-6 mice/group). (H) Quantification of DCs (Live B220<sup>-</sup>TCRb<sup>-</sup>CD11b<sup>+</sup>CD11c<sup>+</sup>MHCII<sup>+</sup>). Welch's t-test was used to compare microbiota groups. \**P*<0.05. Data shown in (A-E) are from N=1 experiment. Data shown in (F-H) are from one of N=2 independent experiments.

**Figure S5. Approach for profiling microbiota-dependent mucosal immune landscape using single cell RNAseq, Related to Figure 7.** (A) Schematic depicting single cell RNAseq (scRNAseq) experiment. (B) Quality control metrics used for filtration of scRNAseq data before proceeding to clustering and differential expression analyses. Only cells with 500-5000 RNA features were retained (between blue dashed lines), as well as cells with <8% genes of mitochondrial (mt) origin. Welch's t-test was used to compare each cell lineage across microbiota groups; \* *P*<0.05, \*\* *P*<0.01, \*\*\* *P*<0.001. N=1 experiment.

**Figure S6. Expression of marker genes mapped to MLN cell clusters, Related to Figure 7.** (A) Violin plots showing expression of marker genes across MLN cell clusters, numbered to match clusters shown in Figure S7.

**Figure S7. Epistatic reversal of *A. muciniphila*-induced MLN immune cell clusters by co-colonization with *Allobaculum* sp. 128, and direct assessment of MLN DC function in co-colonized gnotobiotic mice, Related to Figure 7 and Figure S6.** (A-E) Graph-based probabilistic analysis of MLN scRNAseq data, comparing two microbiota groups at a time. (A-B) MC+Allo relative to MC+Both or relative to MC. (C-E) MC+Akk relative to MC+Both reveals strong reversal (high MELD score) of cell clusters induced by *A. muciniphila* after co-colonization with *Allobaculum* sp. 128. The marker genes that define each cluster are displayed in Figure S6. (F-G) *Ex vivo* co-cultures of purified MLN DCs from gnotobiotic mice were examined for their capacity to prime CellTrace Violet (CTV)-labeled naïve OT-II T cells, by proliferation and dilution of CTV. Data shown are from N=1 experiment.

## SUPPLEMENTAL TABLES

**Table S1. *Allobaculum* and *A. muciniphila* abundance in two human cohorts broadly reflects an inverse relationship, Related to Figure 3.** (Sheet 1. American Gut Project) Enumeration of sequencing data from American Gut Project (McDonald, et al. 2018; QIITA study IDs: 48742, 51570, 52698, 53379, & 54454). (Sheet 2. Schirmer\_UC) Relative abundance data from pediatric ulcerative colitis (Schirmer, et al. 2018).

**Table S2. Human microbiota-associated gnotobiotic mouse screen reveals inverse correlation between *Allobaculum sp. 128* and *A. muciniphila*, Related to Figure 3.** (Sheet 1. Relative Abundance) fecal microbiota profiles across n=19 gnotobiotic mice. (Sheet 2. Correlation Metrics, Sorted) Compiled statistics evaluating correlation and logistic regression between each pair of microbiota OTUs.

Figure S1.

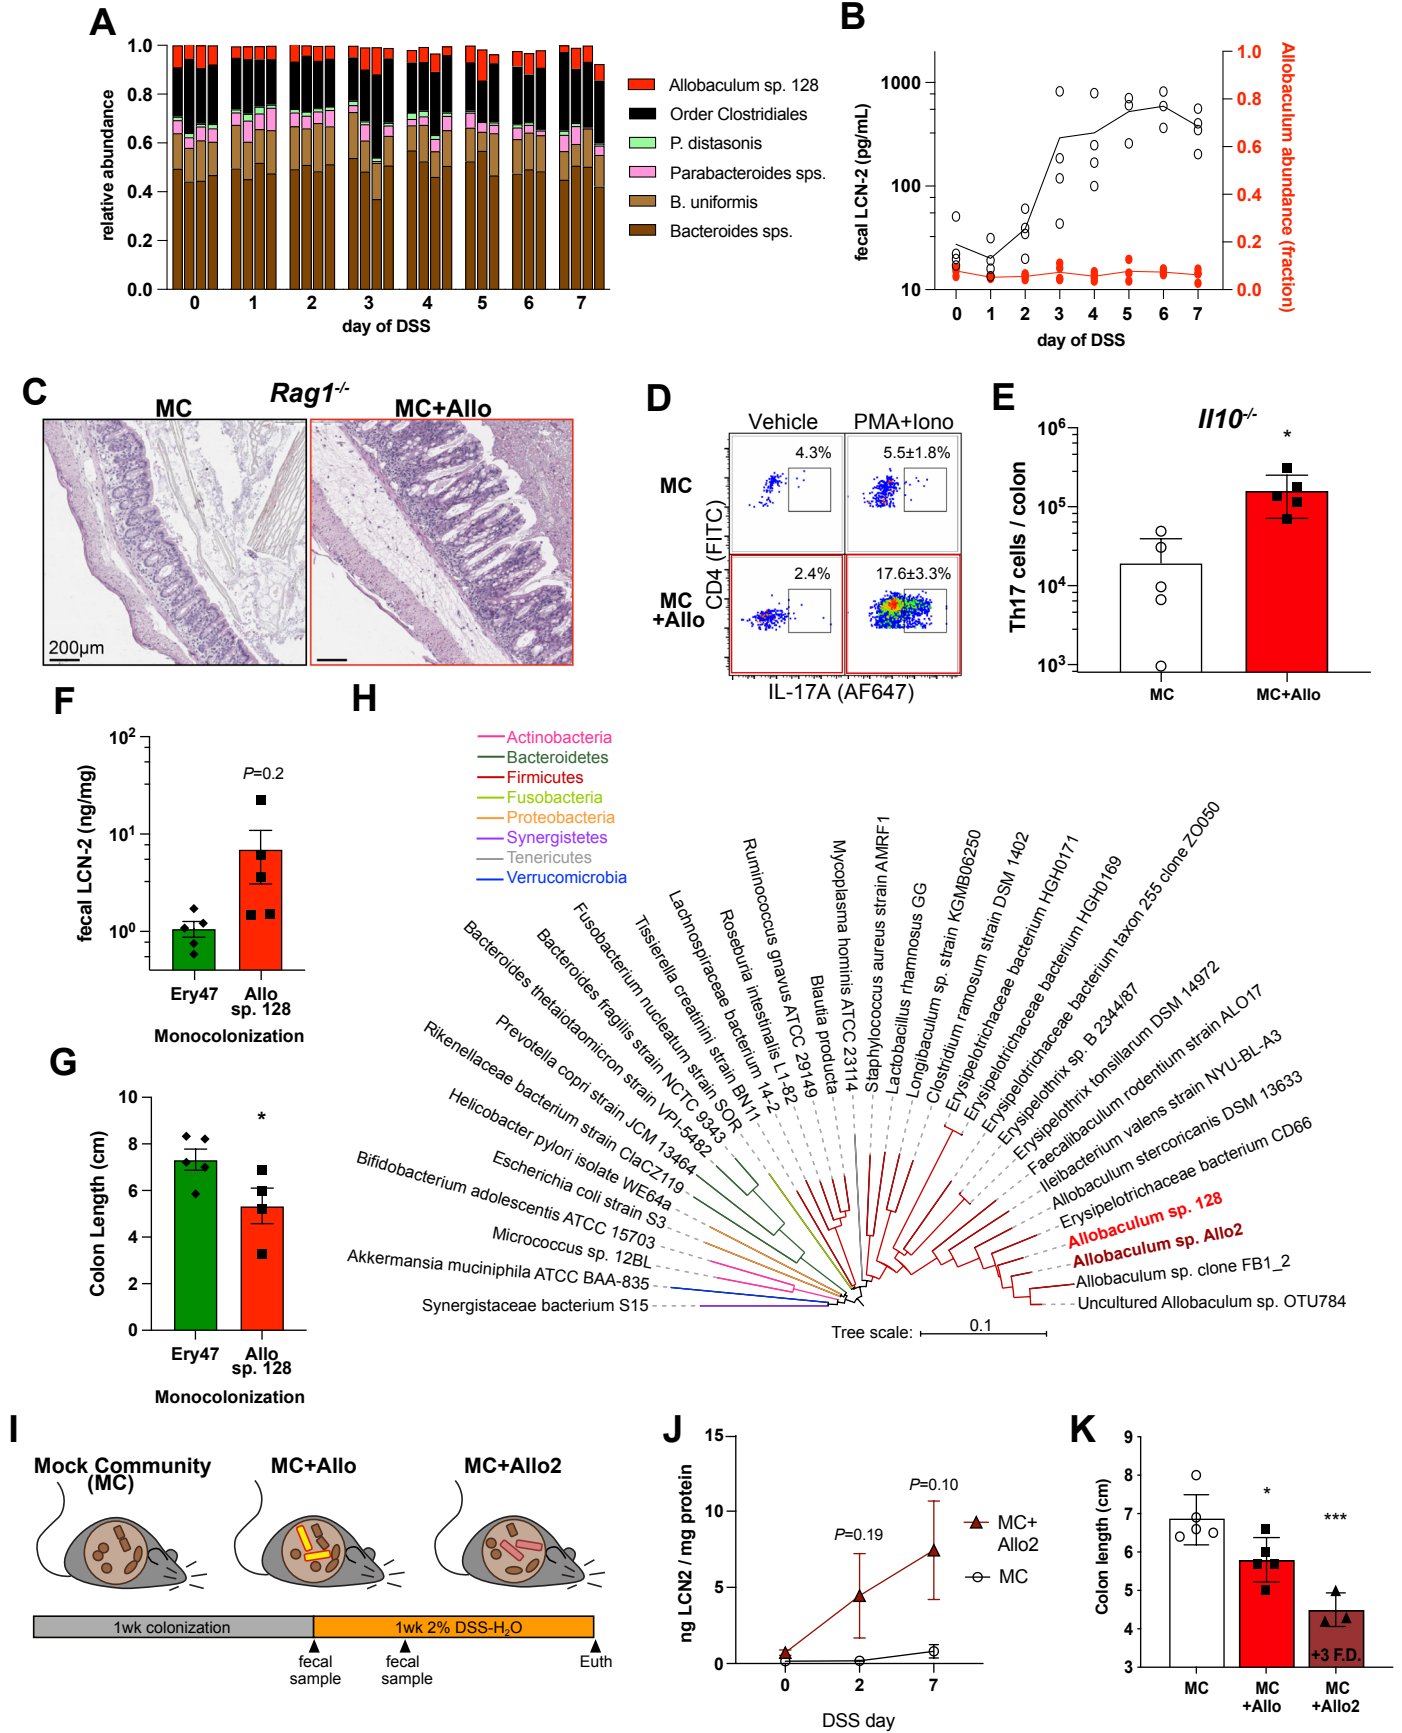



Figure S2.

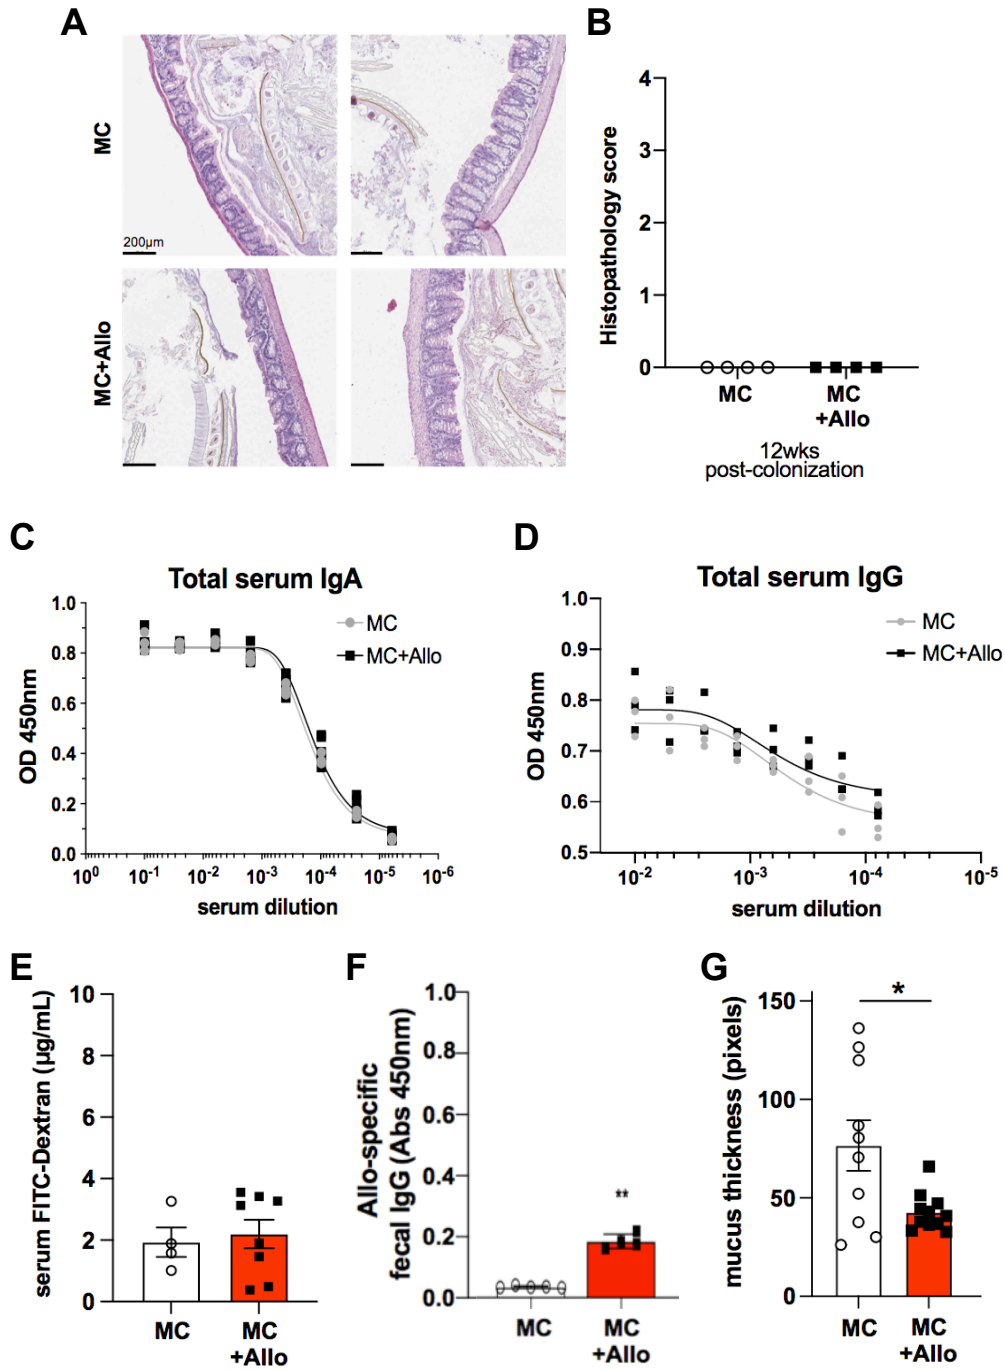

Figure S3.

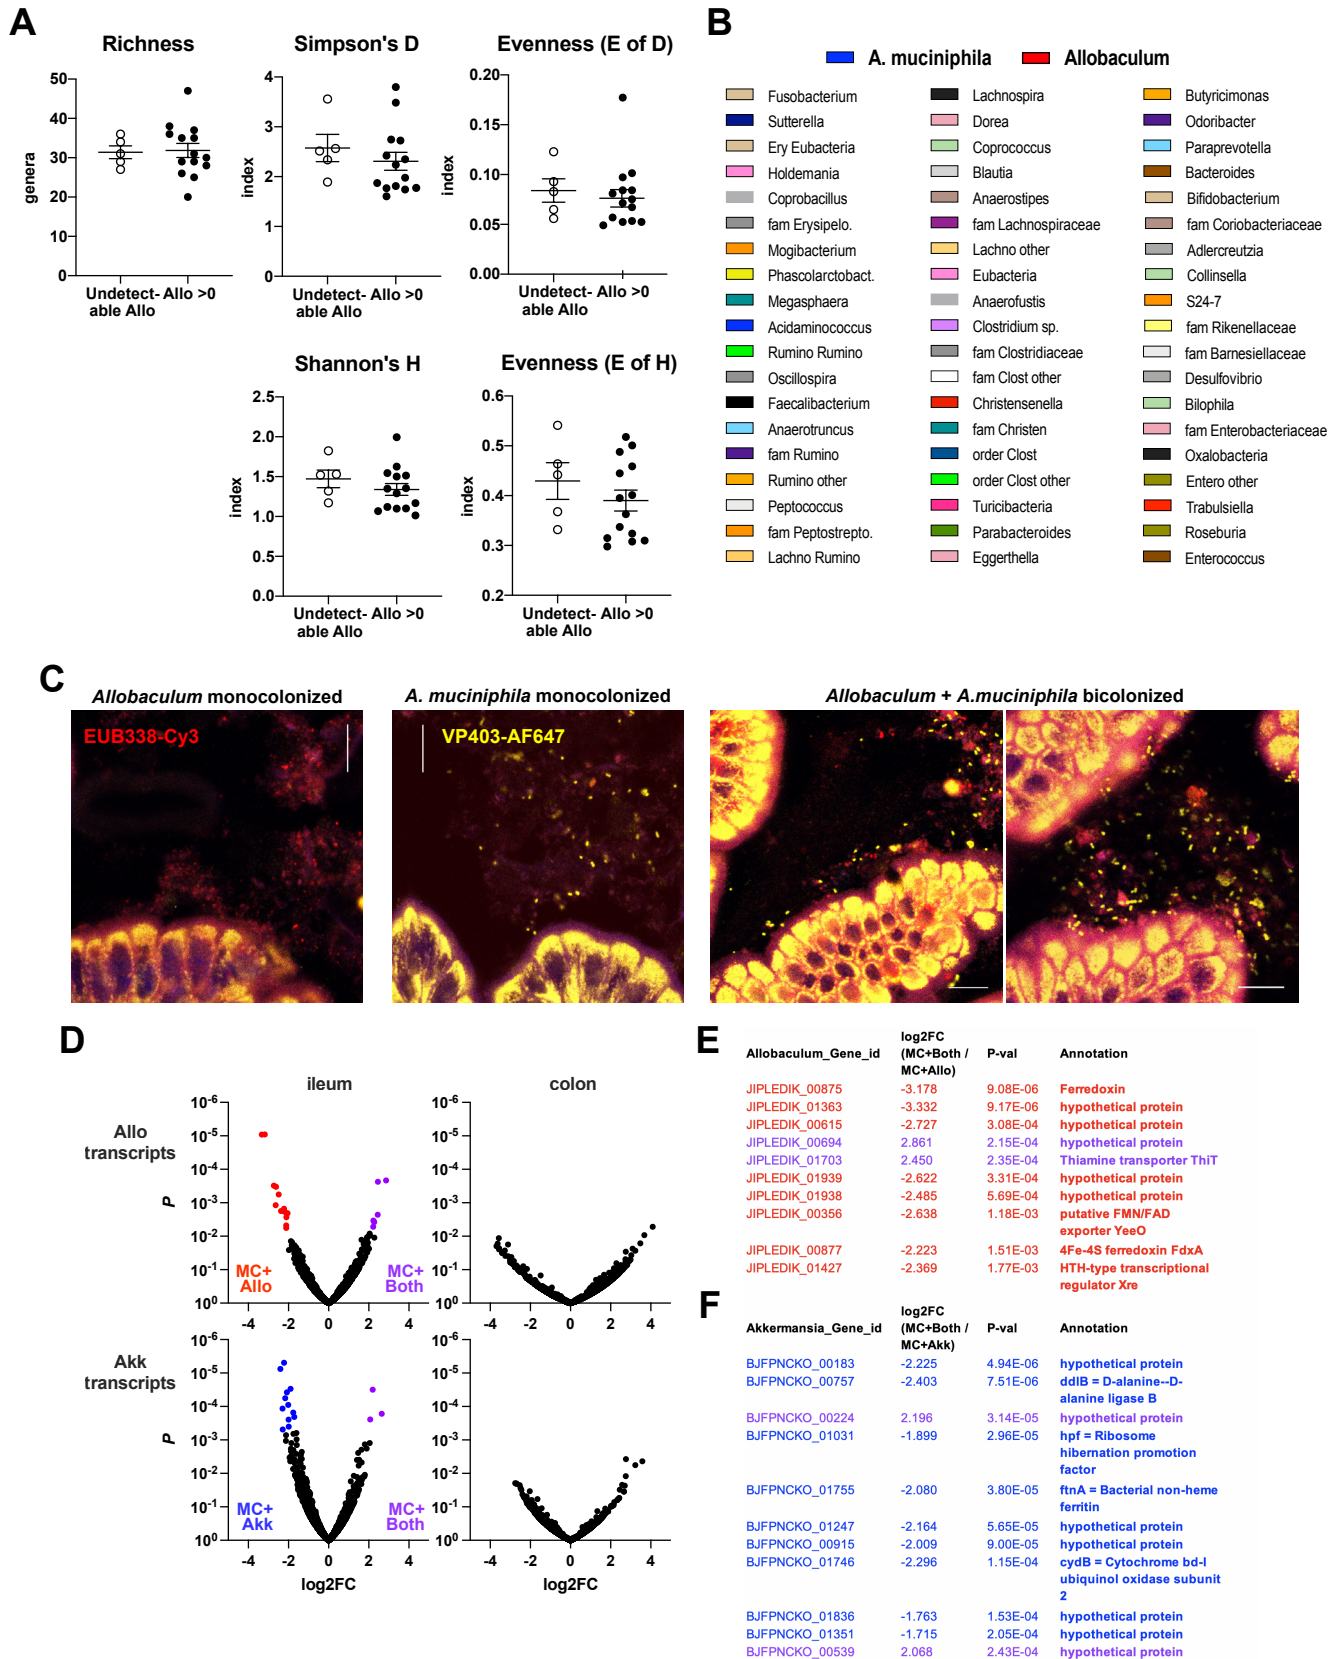

**Figure S4.**

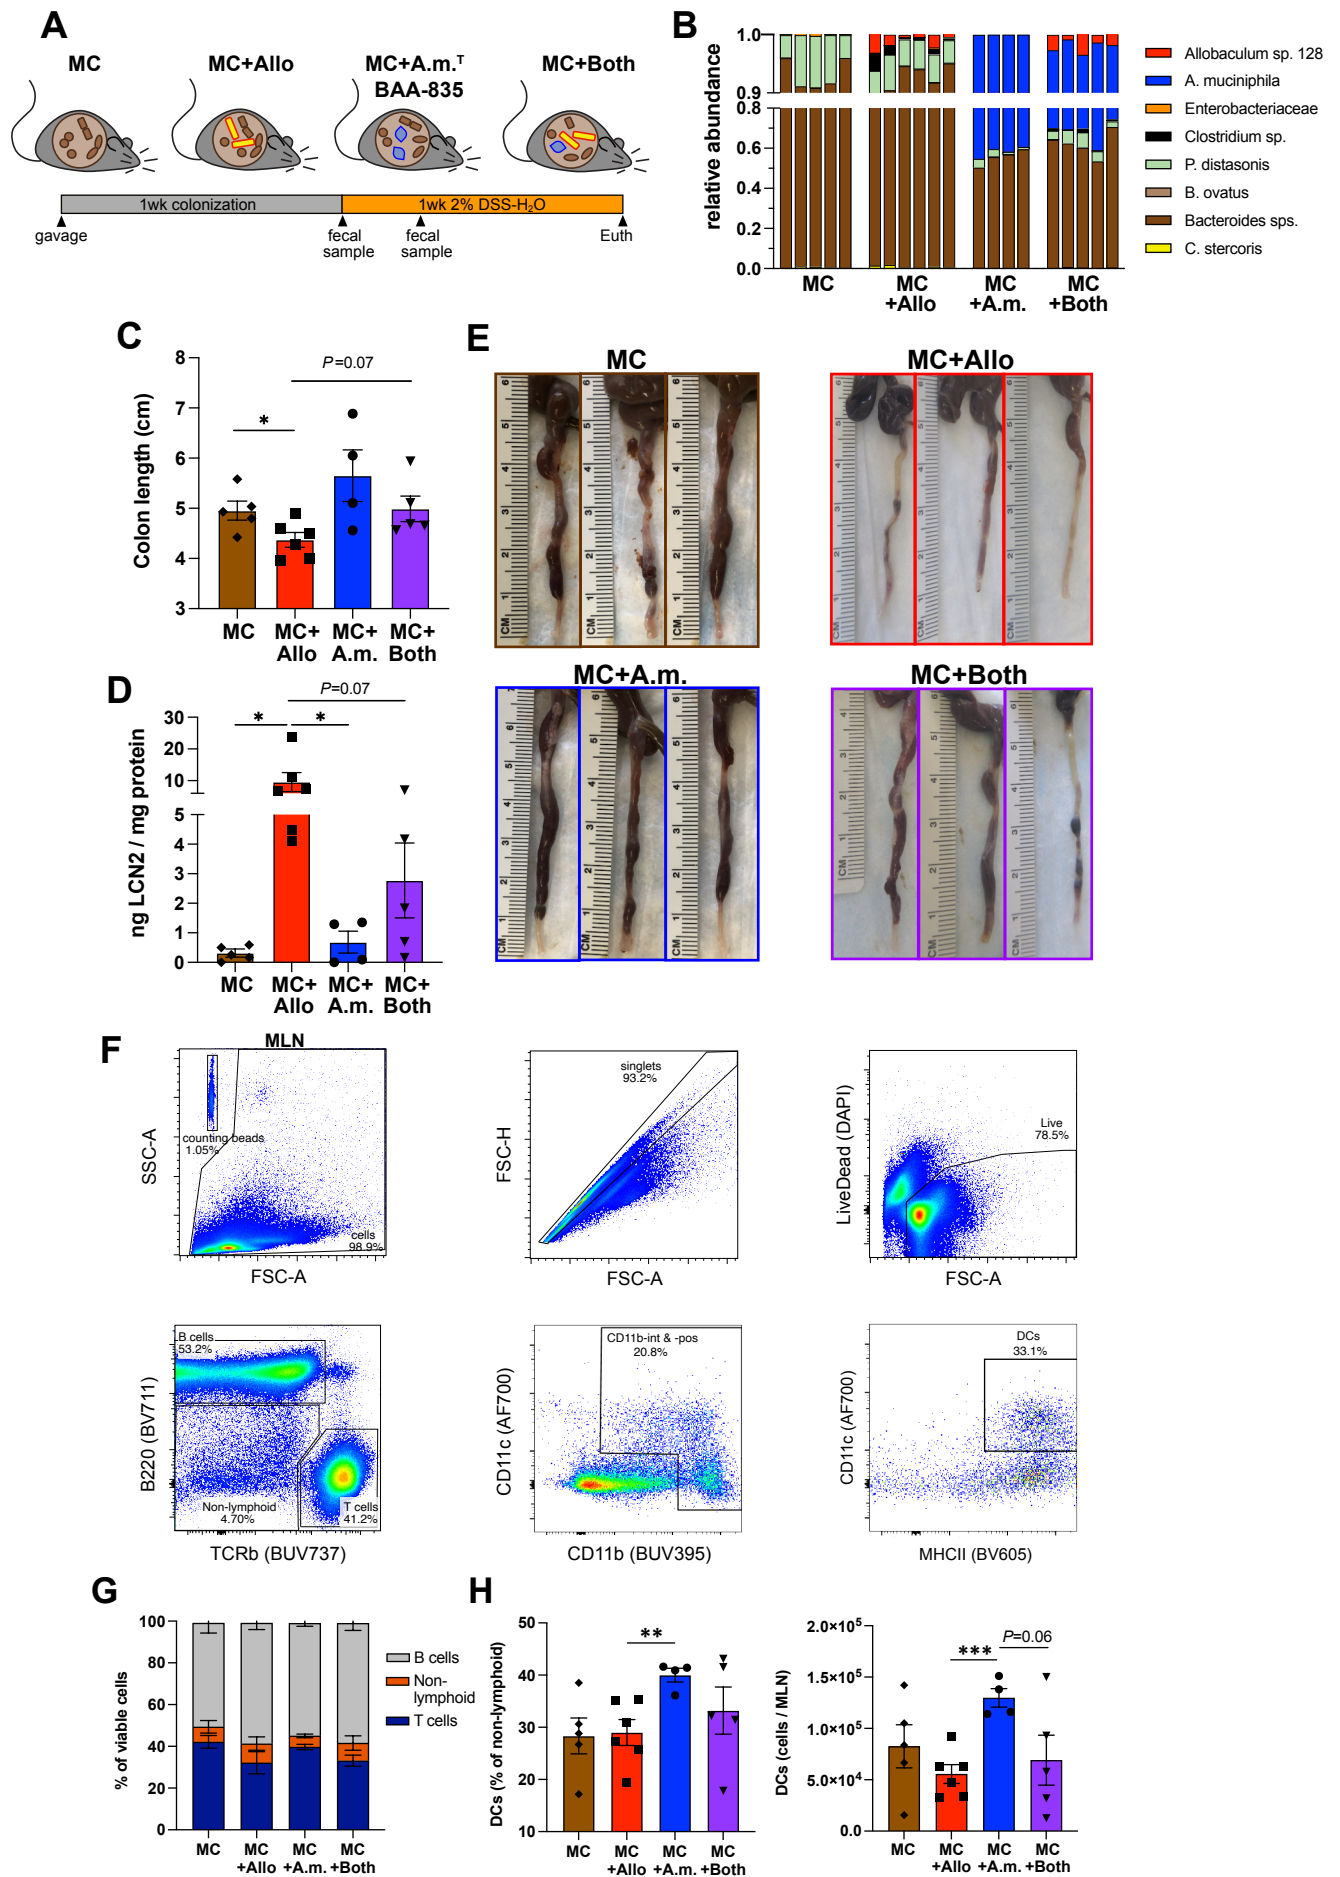

**Figure S5.**

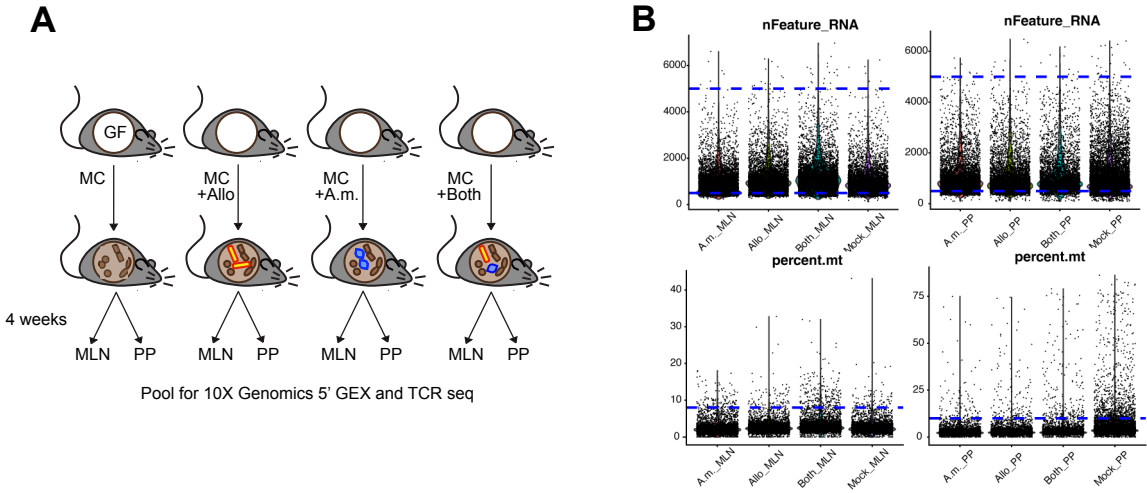

Figure S6.

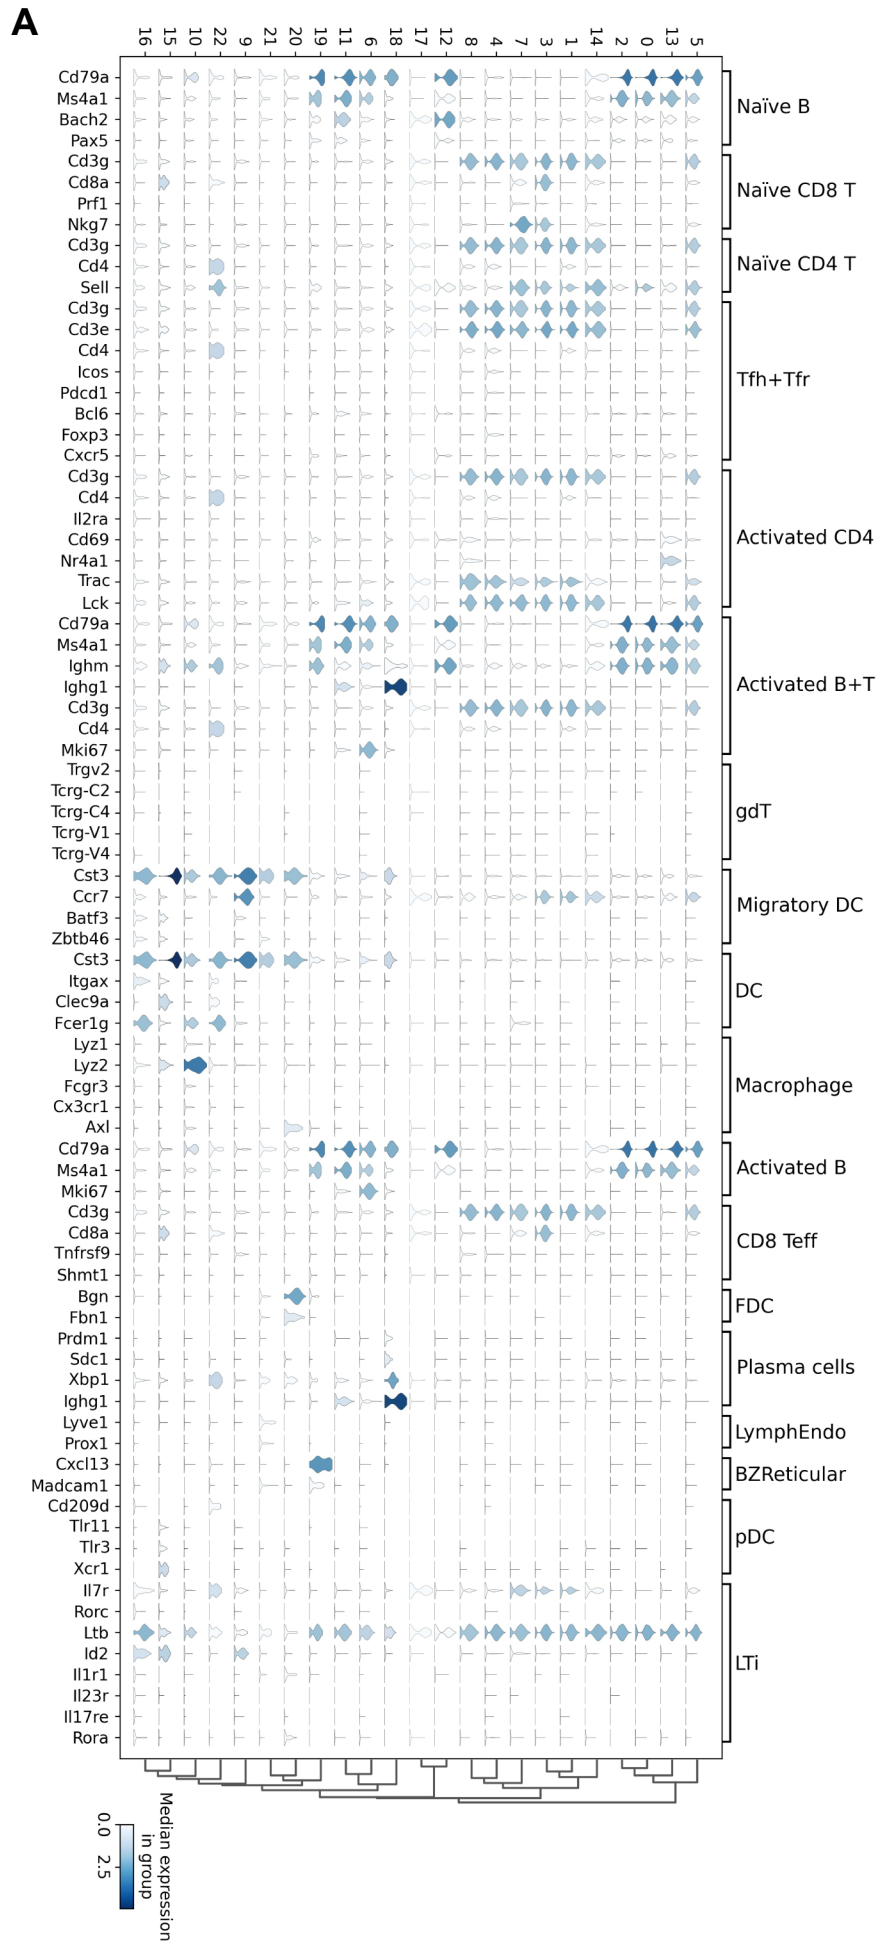

Figure S7.

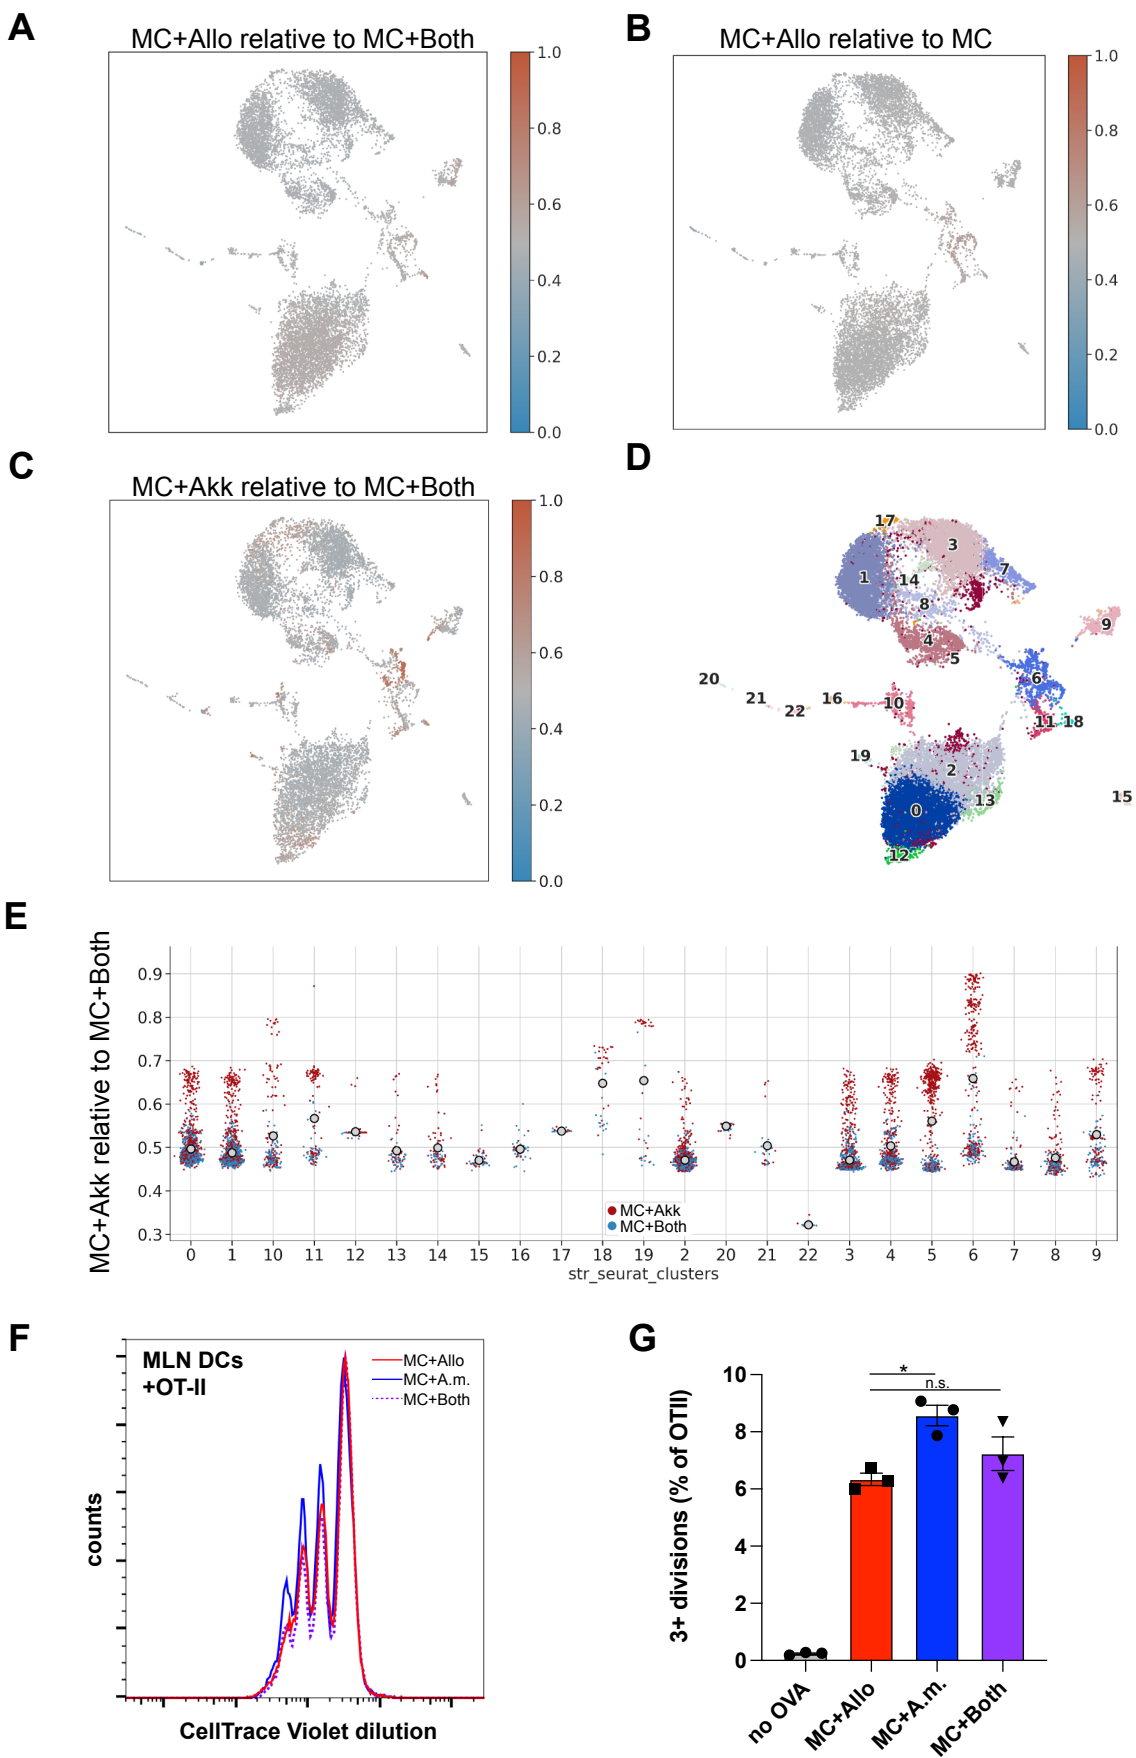

Supplement: NIHMS1811953-supplement-2.pdf [file NIHMS1811953-supplement-2.pdf]
